# Supplementary material for: The Evolution of Tyrosine-Recombinase Elements in Nematoda
Source: PubMed Central journal article supplement (PMC4157794; doi:10.1371/journal.pone.0106630), 2014-09-08

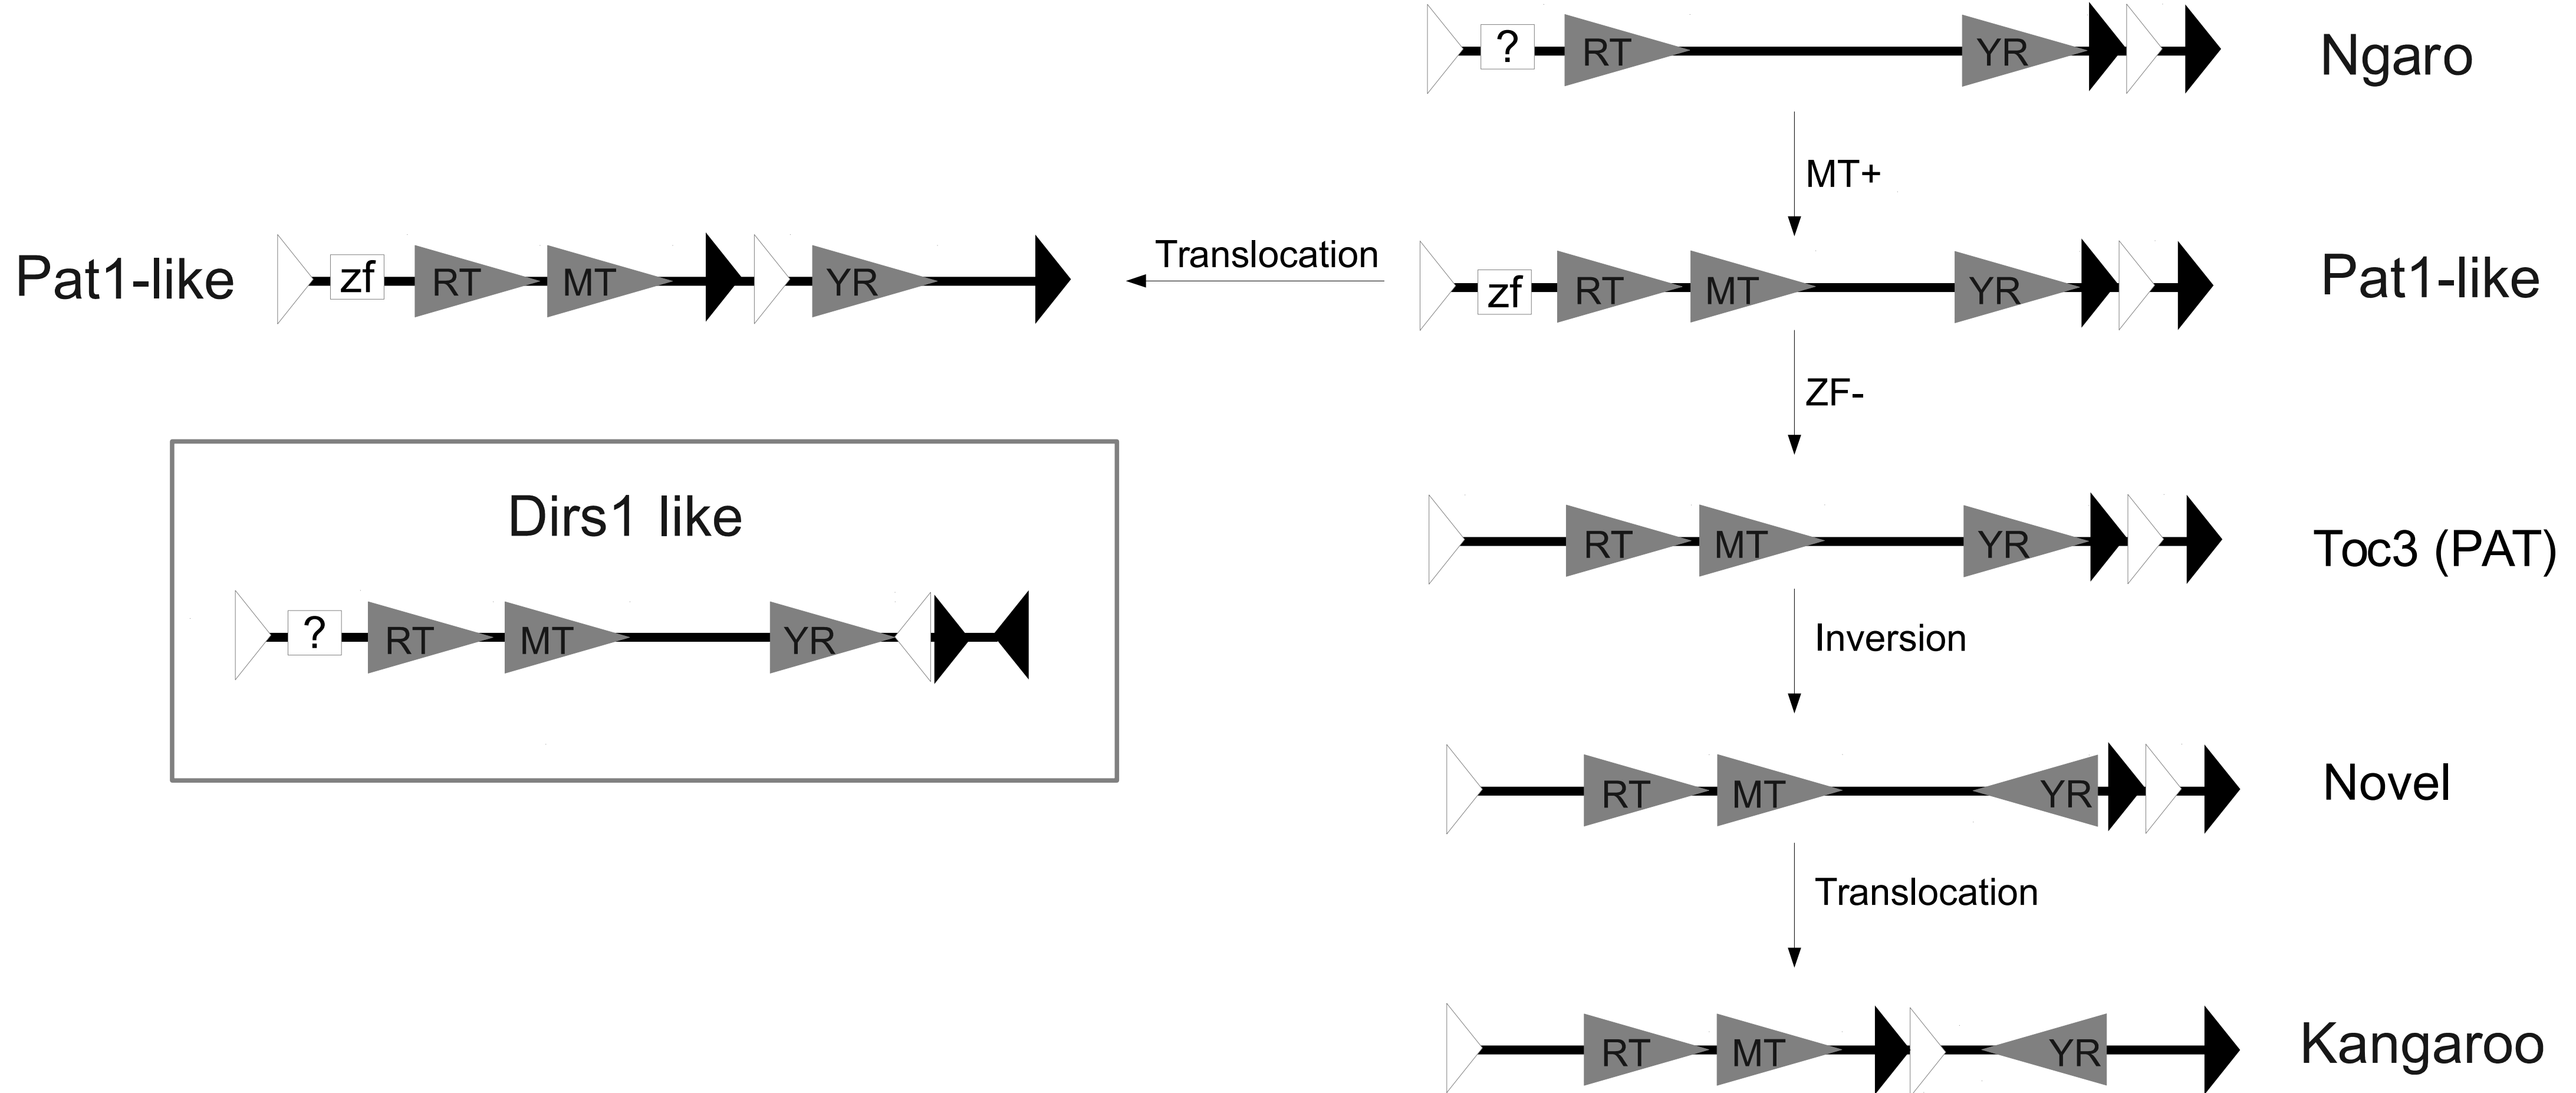

Supplement: pone.0106630.s002.pdf [file pone.0106630.s002.pdf]
